# Supplementary material for: Highly stretchable cell-cultured hydrogel sheet
Source: Royal Society of Chemistry journal article supplement (doi:10.1039/c5ra11059a), 2015-01-01
Supplement: c5ra11059a1.pdf [file c5ra11059a1.pdf]

## Supplementary Information

### Highly Stretchable Cell-Cultured Hydrogel Sheet

Kuniaki Nagamine, Yuina Abe, Hiroyuki Kai, Hirokazu Kaji, and Matsuhiko Nishizawa\*

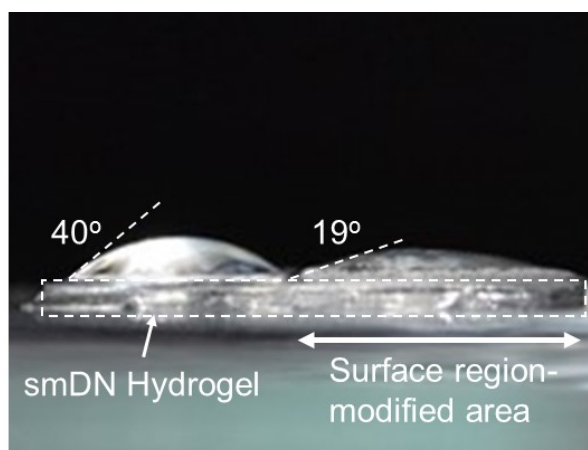

**Supplementary Fig. S1** Photograph of water droplets on the smDN hydrogel. Only the right half of the hydrogel was modified with the third PNaAMPS polymer through a photomask.

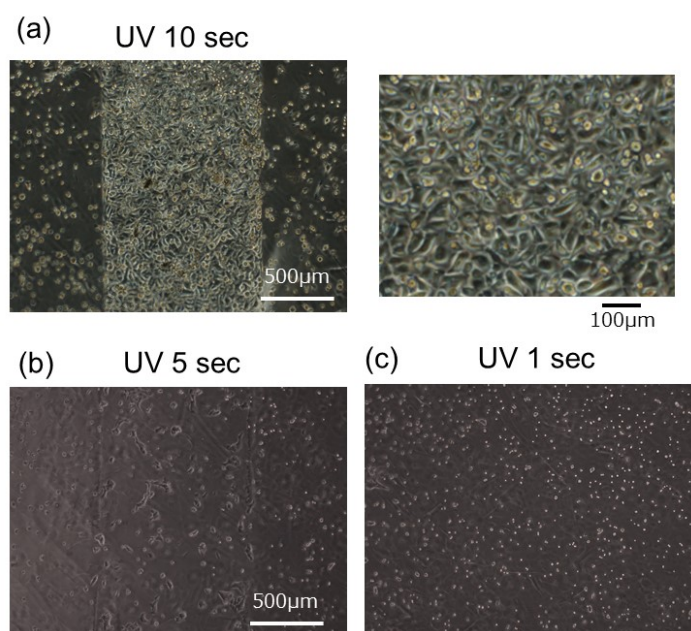

**Supplementary Fig. S2** Phase contrast micrographs of keratinocytes cultured on the smDN hydrogel prepared by (a) 10, (b) 5, and (c) 1 s of UV ( $350 \text{ mW cm}^{-2}$ ) polymerization of the line pattern of third NaAMPS polymer through a photomask. The image on the right side of (a) is the magnified image of the left side. The magnified image suggested spreading morphology of the cells that adhere on the smDN hydrogel.

## Supplementary Information

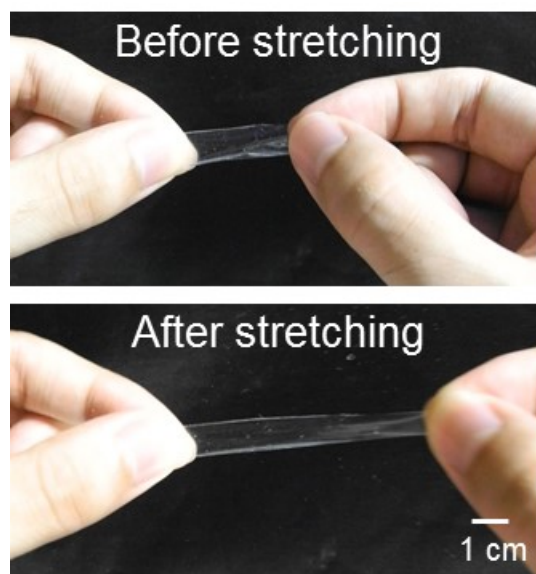

**Supplementary Fig. S3** Photographs of the smDN hydrogels before and after stretching.

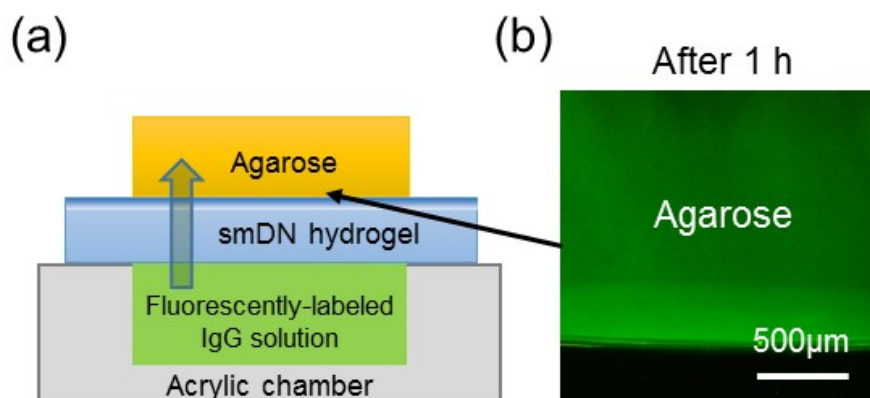

**Supplementary Fig. S4** (a) Illustration of the setup for molecular permeability testing of the smDN hydrogel. (b) Fluorescence images of the cross section of the agarose absorption pad put on the smDN hydrogel after 1 h of permeability testing.
